# Supplementary material for: Sorafenib-Mediated Targeting of the AAA+ ATPase p97/VCP Leads to Disruption of the Secretory Pathway, Endoplasmic Reticulum Stress, and Hepatocellular Cancer Cell Death
Source: Oxford University Press journal article supplement (doi:10.1158/1535-7163.mct-12-0516), 2012-10-06
Supplement: 15357163mct120516-sup-figleg.pdf [file 15357163mct120516-sup-figleg.pdf]

## Supplemental Material

### Supplementary Table 1 - PCR primers used in this study

**Supplementary Table 2** – Quantification of eIF2 $\alpha$  phosphorylation upon sorafenib treatment. X-ray film were quantified using scanning densitometry and data are represented as arbitrary units  $\pm$  SD.

**Figure S1.** (A) Quantification of Xbp1 mRNA splicing shown in Figure 2A. (B) Wild-type HepG2 cells were either not treated or treated with 10  $\mu$ M Sorafenib for 2 h followed by staining for giantin, a Golgi complex marker,  $\alpha$ -tubulin, as a marker for the microtubules and Hoechst 33342 as a nuclear marker. (C) Cells treated as above were immunostained against giantin and phalloidin was used to stain the actin cytoskeleton. Images were acquired by wide-field fluorescence microscopy. Scale bars correspond to 25  $\mu$ m.

**Figure S2.** (A) HepG2 cells were either not treated or treated with 10  $\mu$ M Sorafenib for 4 h, after which they were either fixed or Sorafenib removed from cells and fresh medium added for a further 2 h. Cells were then stained with anti Giantin (green). Scale bars correspond to 25  $\mu$ m. (B) The number of cells containing fragmented Golgi complex was quantified. Between 200 and 400 cells were analyzed for each condition and results are represented as the means  $\pm$  SD. Student's t-test \*:  $p < 0.03$ , compared to control, #:  $p < 0.03$  HepG2 mock transfected compared to IRE1-DN transfected cells.
